# Supplementary material for: Association between Sarcopenic Obesity Status and Nonalcoholic Fatty Liver Disease and Fibrosis
Source: PubMed Central journal article supplement — Gut Liver. 2022 Dec 6;17(1):130–8. doi: 10.5009/gnl220041 (PMC9840924; doi:10.5009/gnl220041), 2022-12-06
Supplement: gnl-17-1-130-supple.pdf [file gnl-17-1-130-supple.pdf]

**Supplementary Table 1.** Comparison of Baseline Characteristics According to the Presence of NAFLD Defined by CAP Score

| Characteristics                    | All           | No NAFLD     | NAFLD         | p-value |
|------------------------------------|---------------|--------------|---------------|---------|
| No.                                | 2,191         | 1,164        | 1,027         | <0.001  |
| Age, yr                            | 52.85±10.76   | 51.65±10.85  | 54.21±10.50   | <0.001  |
| Sex, male/female                   | 1,368/823     | 663/501      | 705/322       | <0.001  |
| Skeletal muscle mass index, %      | 29.31±3.81    | 29.94±3.82   | 28.61±3.68    | <0.001  |
| Body fat mass, %                   | 28.71±7.58    | 26.91±7.52   | 30.74±7.11    | <0.001  |
| Body mass index, kg/m <sup>2</sup> | 25.35±3.83    | 23.87±3.39   | 27.03±3.60    | <0.001  |
| Systolic blood pressure, mm Hg     | 122.07±11.99  | 120.94±12.22 | 123.35±11.60  | <0.001  |
| Diastolic blood pressure, mm Hg    | 72.00±8.57    | 71.32±8.58   | 72.78±8.49    | <0.001  |
| Fasting plasma glucose, mg/dL      | 104.16±23.49  | 99.97±19.85  | 108.91±26.24  | <0.001  |
| Total cholesterol, mg/dL           | 204.85±42.22  | 202.68±41.76 | 207.31±42.64  | 0.01    |
| Triglyceride, mg/dL                | 143.66±100.89 | 117.16±61.54 | 173.72±125.45 | <0.001  |
| HDL-C, mg/dL                       | 54.86±13.40   | 58.02±14.38  | 51.28±11.16   | <0.001  |
| LDL-C, mg/dL                       | 128.96±33.59  | 126.00±33.63 | 132.32±33.25  | <0.001  |
| Aspartate aminotransferase, IU/L   | 32.04±19.77   | 30.35±17.69  | 33.96±21.75   | <0.001  |
| Alanine aminotransferase, IU/L     | 32.26±23.63   | 27.25±18.69  | 37.96±27.12   | <0.001  |
| γ-Glutamyl transferase, IU/L       | 38.44±56.24   | 32.88±43.73  | 44.74±67.14   | <0.001  |
| Insulin, μIU/mL                    | 8.38±5.26     | 6.83±4.13    | 10.24±5.84    | <0.001  |
| Diabetes, %                        | 364 (16.7)    | 160 (13.7)   | 204 (19.9)    | <0.001  |
| Smoking, %                         | 426 (20.7)    | 200 (17.1)   | 226 (22.0)    | 0.001   |
| Exercise, %                        | 1,524 (69.6)  | 847 (72.8)   | 677 (65.9)    | 0.002   |
| CAP, dB/m                          | 4.33±2.47     | 3.96±2.51    | 4.75±2.36     | <0.001  |

Data are presented as mean±SD or number (%).

NAFLD, nonalcoholic fatty liver disease; CAP, controlled attenuation parameter; HDL-C, high-density lipoprotein cholesterol; LDL-C, low-density lipoprotein cholesterol.

**Supplementary Table 2.** Association between Fatty Liver Grade in Ultrasound and Sarcopenic Obesity Status Analyzed by Chi-Square Test (p<0.001)

|                      | Sarcopenic obesity status, No. (%) |            |           |                    | Total       |
|----------------------|------------------------------------|------------|-----------|--------------------|-------------|
|                      | Optimal                            | Sarcopenia | Obesity   | Sarcopenic obesity |             |
| Mild fatty liver     | 202 (59.4)                         | 35 (53.8)  | 77 (42.3) | 227 (38.3)         | 545 (46.3)  |
| Moderate fatty liver | 115 (33.8)                         | 24 (36.9)  | 75 (41.2) | 247 (41.7)         | 459 (39.0)  |
| Severe fatty liver   | 23 (6.8)                           | 6 (9.2)    | 30 (16.5) | 119 (20.1)         | 172 (14.6)  |
| Total                | 340 (100)                          | 65 (100)   | 182 (100) | 593 (100)          | 1,180 (100) |

**Supplementary Table 3.** Odds Ratio of Risk Factors for NAFLD Defined by CAP Score According to the Sarcopenic Obesity Status

|                                     | Odds ratio (95% CI) |                  |                  |                    | p for trend |
|-------------------------------------|---------------------|------------------|------------------|--------------------|-------------|
|                                     | Optimal             | Sarcopenia       | Obesity*         | Sarcopenic obesity |             |
| Unadjusted                          | 1                   | 1.09 [0.76–1.56] | 3.13 [2.38–4.13] | 4.28 [3.51–5.23]   | <0.001      |
| Age and sex adjusted                | 1                   | 1.30 [0.89–1.91] | 2.68 [2.02–3.55] | 4.19 [3.41–5.14]   | <0.001      |
| Multivariable adjusted <sup>†</sup> | 1                   | 1.32 [0.88–1.97] | 2.53 [1.89–3.38] | 3.77 [3.03–4.67]   | <0.001      |

NAFLD, nonalcoholic fatty liver disease; CAP, controlled attenuation parameter; CI, confidence interval.

\*Obesity was defined by fat mass; <sup>†</sup>Age, sex, systolic blood pressure, fasting plasma glucose, presence of diabetes, presence of hypertension, smoking, and exercise.

**Supplementary Table 4.** Odds Ratio of Risk Factors for NAFLD According to the Sarcopenic Obesity Status

|                                     | Odds ratio (95% CI) |                  |                  |                    | p for trend |
|-------------------------------------|---------------------|------------------|------------------|--------------------|-------------|
|                                     | Optimal             | Sarcopenia       | Obesity*         | Sarcopenic obesity |             |
| Unadjusted                          | 1                   | 1.70 (1.30–2.23) | 3.45 (2.68–4.43) | 5.50 (4.39–6.87)   | <0.001      |
| Age and sex adjusted                | 1                   | 2.34 (1.74–3.15) | 2.74 (2.11–3.55) | 5.43 (4.32–6.83)   | <0.001      |
| Multivariable adjusted <sup>†</sup> | 1                   | 2.27 (1.66–3.11) | 2.55 (1.95–3.34) | 4.62 (3.62–5.90)   | <0.001      |

NAFLD, nonalcoholic fatty liver disease; CI, confidence interval.

\*Obesity was defined by body mass index; <sup>†</sup>Age, sex, systolic blood pressure, fasting plasma glucose, presence of diabetes, presence of hypertension, smoking, and exercise.

**Supplementary Table 5.** Odds Ratio of Risk Factors for Liver Fibrosis According to Sarcopenic Obesity Status

|                                     | Odds ratio (95% CI) |                  |                  |                    | p for trend |
|-------------------------------------|---------------------|------------------|------------------|--------------------|-------------|
|                                     | Optimal             | Sarcopenia       | Obesity*         | Sarcopenic obesity |             |
| Unadjusted                          | 1                   | 2.07 (1.37–3.14) | 3.33 (2.32–4.78) | 4.59 (3.32–6.30)   | <0.001      |
| Age and sex adjusted                | 1                   | 1.63 (1.04–2.56) | 3.47 (2.40–5.00) | 4.43 (3.22–6.09)   | <0.001      |
| Multivariable adjusted <sup>†</sup> | 1                   | 1.69 (1.05–2.71) | 3.41 (2.34–4.99) | 4.08 (2.92–5.71)   | <0.001      |

CI, confidence interval.

\*Obesity was defined by body mass index; <sup>†</sup>Age, sex, systolic blood pressure, fasting plasma glucose, presence of diabetes, presence of hypertension, smoking, and exercise.
